# Supplementary material for: Ring-Opening Polymerization of ε-Caprolactone and Styrene Oxide–CO2 Coupling Reactions Catalyzed by Chelated Dehydroacetic Acid–Imine Aluminum Complexes
Source: MDPI journal article supplement (doi:10.3390/molecules27010164), 2021-12-28
Supplement: s1 [file s1]

## Electronic Supplementary Information

### Ring Opening Polymerization of $\epsilon$ -Caprolactone and Styrene Oxide-CO<sub>2</sub> Coupling Reactions Catalyzed by Chelated Dehydroacetic Acid-imine Aluminum Complexes

Ting-Yen Wang <sup>1</sup>, Yu-Chia Su <sup>2</sup>, Bao-Tsan Ko <sup>2</sup>, Yu Hsu<sup>1</sup>, Yu-Fang Zeng <sup>1</sup>, Ching-Han Hu <sup>1</sup>, Amitabha Datta <sup>1</sup> and Jui-Hsien Huang <sup>1,\*</sup>

Table S1. The summary of X-ray crystal data for L<sub>1</sub>H~L<sub>4</sub>H, **1**, **3**, and **4**

|                              | L <sub>1</sub> H                                | L <sub>2</sub> H                                | L <sub>3</sub> H                                | L <sub>4</sub> H                                              | <b>1</b>                                          | <b>3</b>                                          | <b>4</b> ·2THF                                                  |
|------------------------------|-------------------------------------------------|-------------------------------------------------|-------------------------------------------------|---------------------------------------------------------------|---------------------------------------------------|---------------------------------------------------|-----------------------------------------------------------------|
| formula                      | C <sub>18</sub> H <sub>21</sub> NO <sub>3</sub> | C <sub>16</sub> H <sub>17</sub> NO <sub>3</sub> | C <sub>16</sub> H <sub>17</sub> NO <sub>4</sub> | C <sub>14</sub> H <sub>14</sub> N <sub>2</sub> O <sub>3</sub> | C <sub>20</sub> H <sub>26</sub> AlNO <sub>3</sub> | C <sub>18</sub> H <sub>22</sub> AlNO <sub>4</sub> | C <sub>24</sub> H <sub>35</sub> AlN <sub>2</sub> O <sub>5</sub> |
| FW                           | 299.36                                          | 271.30                                          | 287.30                                          | 258.27                                                        | 355.40                                            | 343.34                                            | 458.52                                                          |
| <i>T</i> [K]                 | 150                                             | 150                                             | 150                                             | 150                                                           | 150                                               | 296                                               | 150                                                             |
| crystal system               | Orthorhombic                                    | Orthorhombic                                    | Monoclinic                                      | Monoclinic                                                    | Monoclinic                                        | Orthorhombic                                      | Monoclinic                                                      |
| space group                  | Pbcn                                            | P2 <sub>1</sub> 2 <sub>1</sub> 2 <sub>1</sub>   | P1 2 <sub>1</sub> /c 1                          | C2/c                                                          | P2 <sub>1</sub> /n                                | Pbcn                                              | P2 <sub>1</sub> /c                                              |
| <i>a</i> [Å]                 | 10.7230(4)                                      | 10.7376(6)                                      | 3.9467(9)                                       | 30.7175(9)                                                    | 10.9949(5)                                        | 34.8423(13)                                       | 13.8302(19)                                                     |
| <i>b</i> [Å]                 | 15.2288(6)                                      | 11.2814(4)                                      | 27.567(6)                                       | 17.7730(6)                                                    | 12.7574(5)                                        | 7.4216(3)                                         | 14.304(2)                                                       |
| <i>c</i> [Å]                 | 21.0174(9)                                      | 11.6410(6)                                      | 12.564(3)                                       | 13.7716(5)                                                    | 13.9045(5)                                        | 13.6698(5)                                        | 13.8016(17)                                                     |
| $\alpha$ [°]                 | 90                                              | 90                                              | 90                                              | 90                                                            | 90                                                | 90                                                | 90                                                              |
| $\beta$ [°]                  | 90                                              | 90                                              | 92.389(8)                                       | 90.701(2)                                                     | 98.891(2)                                         | 90                                                | 112.082(6)                                                      |
| $\gamma$ [°]                 | 90                                              | 90                                              | 90                                              | 90                                                            | 90                                                | 90                                                | 90                                                              |
| <i>V</i> [Å <sup>3</sup> ]   | 3432.1(2)                                       | 1410.13(12)                                     | 1365.8(5)                                       | 7517.9(4)                                                     | 1926.90(14)                                       | 3534.8(2)                                         | 2530.0(6)                                                       |
| <i>Z</i>                     | 8                                               | 4                                               | 4                                               | 24                                                            | 4                                                 | 8                                                 | 4                                                               |
| $\rho$ [Mg m <sup>-3</sup> ] | 1.159                                           | 1.278                                           | 1.397                                           | 1.369                                                         | 1.225                                             | 1.290                                             | 1.204                                                           |

|                                                                            |                                                                   |                                                                   |                                                                  |                                                                  |                                                                  |                                                                  |                                                                  |
|----------------------------------------------------------------------------|-------------------------------------------------------------------|-------------------------------------------------------------------|------------------------------------------------------------------|------------------------------------------------------------------|------------------------------------------------------------------|------------------------------------------------------------------|------------------------------------------------------------------|
| $\mu$ [mm <sup>-1</sup> ]                                                  | 0.079                                                             | 0.088                                                             | 0.101                                                            | 0.098                                                            | 0.123                                                            | 0.136                                                            | 0.115                                                            |
| <i>F</i> (000)                                                             | 1280                                                              | 576                                                               | 608                                                              | 3264                                                             | 760                                                              | 1456                                                             | 984                                                              |
| rflns collected                                                            | 59750                                                             | 26689                                                             | 19454                                                            | 62025                                                            | 35324                                                            | 62164                                                            | 35563                                                            |
| independent<br>rflns                                                       | 3015<br>[ <i>R</i> <sub>int</sub> =0.0537]                        | 3337<br>[ <i>R</i> <sub>int</sub> =0.0382]                        | 2399<br>[ <i>R</i> <sub>int</sub> =0.0913]                       | 6583<br>[ <i>R</i> <sub>int</sub> =0.0415]                       | 4572<br>[ <i>R</i> <sub>int</sub> =0.0395]                       | 4561<br>[ <i>R</i> <sub>int</sub> =0.0422]                       | 6566<br>[ <i>R</i> <sub>int</sub> =0.0307]                       |
| data/restraints/<br>parameters                                             | 3015/0/204                                                        | 3337/0/184                                                        | 2399/0/194                                                       | 6583/0/520                                                       | 4572/0/233                                                       | 4561/0/222                                                       | 6566/0/293                                                       |
| goodness-of-fit<br>on <i>F</i> <sup>2</sup>                                | 1.059                                                             | 1.133                                                             | 0.781                                                            | 1.122                                                            | 1.071                                                            | 1.509                                                            | 1.098                                                            |
| <i>R</i> <sub>1</sub> , <i>wR</i> <sub>2</sub> ( <i>I</i> >2σ( <i>I</i> )) | <i>R</i> <sub>1</sub> =0.0366,<br><i>wR</i> <sub>2</sub> =0.0949  | <i>R</i> <sub>1</sub> =0.0360,<br><i>wR</i> <sub>2</sub> =0.1004  | <i>R</i> <sub>1</sub> =0.0781,<br><i>wR</i> <sub>2</sub> =0.2288 | <i>R</i> <sub>1</sub> =0.0552,<br><i>wR</i> <sub>2</sub> =0.1625 | <i>R</i> <sub>1</sub> =0.0426,<br><i>wR</i> <sub>2</sub> =0.1257 | <i>R</i> <sub>1</sub> =0.0526,<br><i>wR</i> <sub>2</sub> =0.1870 | <i>R</i> <sub>1</sub> =0.0484,<br><i>wR</i> <sub>2</sub> =0.1548 |
| <i>R</i> <sub>1</sub> , <i>wR</i> <sub>2</sub><br>(all data)               | <i>R</i> <sub>1</sub> =0.04626,<br><i>wR</i> <sub>2</sub> =0.1033 | <i>R</i> <sub>1</sub> =0.0412,<br><i>wR</i> <sub>2</sub> =0.11139 | <i>R</i> <sub>1</sub> =0.1021,<br><i>wR</i> <sub>2</sub> =0.2603 | <i>R</i> <sub>1</sub> =0.0679,<br><i>wR</i> <sub>2</sub> =0.1787 | <i>R</i> <sub>1</sub> =0.0518,<br><i>wR</i> <sub>2</sub> =0.1398 | <i>R</i> <sub>1</sub> =0.0652,<br><i>wR</i> <sub>2</sub> =0.1956 | <i>R</i> <sub>1</sub> =0.0560,<br><i>wR</i> <sub>2</sub> =0.1624 |
| largest diff. peak,<br>hole [eÅ <sup>-3</sup> ]                            | 0.194/-0.187                                                      | 0.285/-0.306                                                      | 0.707/-0.515                                                     | 0.394/-0.364                                                     | 0.602/-0.372                                                     | 0.278/-0.685                                                     | 0.532/-0.589                                                     |

Table S2. Selected bond lengths and angles for **L<sub>1</sub>H**–**L<sub>4</sub>H**, **1**, **3**, and **4**

| <b>L<sub>1</sub>H</b> |            |           |            |
|-----------------------|------------|-----------|------------|
| N(1)–C(7)             | 1.3162(18) | O(2)–C(3) | 1.3661(18) |
| O(2)–C(5)             | 1.3947(17) | O(3)–C(5) | 1.2160(18) |
| O(1)–C(1)             | 1.2586(18) | C(7)–C(6) | 1.429(2)   |
| C(1)–C(2)             | 1.443(2)   | C(3)–C(2) | 1.331(2)   |
| C(6)–C(1)             | 1.4448(19) | N(1)–C(9) | 1.4385(18) |
| C(6)–C(5)             | 1.438(2)   |           |            |
| <b>L<sub>2</sub>H</b> |            |           |            |
| O(2)–C(3)             | 1.364(3)   | O(2)–C(5) | 1.403(2)   |
| O(3)–C(5)             | 1.210(2)   | O(1)–C(1) | 1.258(2)   |
| N(1)–C(7)             | 1.313(2)   | C(7)–C(6) | 1.433(2)   |
| C(6)–C(5)             | 1.439(2)   | C(6)–C(1) | 1.442(2)   |
| C(1)–C(2)             | 1.451(2)   | N(1)–C(9) | 1.474(2)   |

|                       |            |                 |            |
|-----------------------|------------|-----------------|------------|
| C(3)-C(2)             | 1.324(3)   |                 |            |
| <b>L<sub>3</sub>H</b> |            |                 |            |
| O(1)-C(1)             | 1.207(5)   | C(2)-C(3)       | 1.329(5)   |
| C(2)-C(5)             | 1.450(5)   | O(3)-C(5)       | 1.253(4)   |
| N(1)-C(7)             | 1.318(5)   | C(1)-O(2)       | 1.398(5)   |
| C(6)-C(7)             | 1.422(5)   | C(5)-C(6)       | 1.441(5)   |
| C(1)-C(6)             | 1.442(5)   | N(1)-C(9)       | 1.471(5)   |
| O(2)-C(3)             | 1.355(5)   |                 |            |
| <b>L<sub>4</sub>H</b> |            |                 |            |
| O(1)-C(10)            | 1.246(3)   | O(2)-C(12)      | 1.365(3)   |
| O(2)-C(14)            | 1.402(3)   | N(2)-C(6)       | 1.456(3)   |
| C(9)-C(7)             | 1.432(3)   | C(9)-C(14)      | 1.434(3)   |
| C(11)-C(12)           | 1.338(4)   | C(10)-C(11)     | 1.438(4)   |
| C(7)-C(8)             | 1.500(3)   | C(9)-C(10)      | 1.442(3)   |
| N(2)-C(7)             | 1.308(3)   | O(3)-C(14)      | 1.224(3)   |
| <b>1</b>              |            |                 |            |
| Al(1)-O(1)            | 1.8031(11) | Al(1)-C(1)      | 1.9576(15) |
| Al(1)-C(2)            | 1.9571(16) | Al(1)-N(1)      | 1.9455(12) |
| C(9)-C(8)             | 1.4636(19) | O(1)-C(3)       | 1.2962(17) |
| O(2)-C(5)             | 1.352(2)   | C(5)-C(4)       | 1.336(2)   |
| O(3)-C(7)             | 1.194(2)   | O(2)-C(7)       | 1.399(2)   |
| C(8)-C(7)             | 1.451(2)   | C(8)-C(3)       | 1.410(2)   |
| C(3)-C(4)             | 1.4351(19) | N(1)-C(9)       | 1.3066(17) |
| N(1)-C(11)            | 1.4479(16) |                 |            |
| O(1)-Al(1)-C(2)       | 108.45(6)  | O(1)-Al(1)-N(1) | 91.63(5)   |
| O(1)-Al(1)-C(1)       | 111.60(6)  | N(1)-Al(1)-C(2) | 109.45(6)  |
| C(2)-Al(1)-C(1)       | 120.34(7)  | N(1)-Al(1)-C(1) | 111.61(6)  |
| <b>3</b>              |            |                 |            |
| Al(1)-O(1)            | 1.7968(15) | Al(1)-N(1)      | 1.9436(15) |
| Al(1)-C(1)            | 1.949(2)   | Al(1)-C(2)      | 1.954(2)   |
| O(2)-C(5)             | 1.355(2)   | O(2)-C(7)       | 1.399(2)   |
| O(3)-C(7)             | 1.213(2)   | O(1)-C(3)       | 1.302(2)   |
| N(1)-C(9)             | 1.305(2)   | N(1)-C(11)      | 1.478(2)   |
| C(9)-C(8)             | 1.465(2)   | C(8)-C(3)       | 1.408(2)   |
| C(8)-C(7)             | 1.443(2)   | C(5)-C(4)       | 1.337(3)   |
| C(3)-C(4)             | 1.431(2)   |                 |            |
| O(1)-Al(1)-N(1)       | 92.88(7)   | O(1)-Al(1)-C(1) | 109.01(8)  |
| N(1)-Al(1)-C(1)       | 109.79(8)  | O(1)-Al(1)-C(2) | 109.54(9)  |

|                 |            |                 |            |
|-----------------|------------|-----------------|------------|
| N(1)-Al(1)-C(2) | 110.50(8)  | C(1)-Al(1)-C(2) | 121.38(10) |
| <b>4</b>        |            |                 |            |
| Al(1)-O(1)      | 1.8984(10) | Al(1)-C(2)      | 1.9759(16) |
| Al(1)-C(1)      | 1.9834(15) | Al(1)-N(1)      | 1.9932(11) |
| Al(1)-N(2)      | 2.1218(12) | O(1)-C(3)       | 1.2824(15) |
| O(3)-C(7)       | 1.2151(16) | O(2)-C(5)       | 1.3643(16) |
| O(2)-C(7)       | 1.3997(15) | C(4)-C(5)       | 1.3372(18) |
| C(4)-C(3)       | 1.4394(17) | C(7)-C(8)       | 1.4379(17) |
| C(8)-C(3)       | 1.4115(16) | C(8)-C(9)       | 1.4570(16) |
| N(1)-C(9)       | 1.3042(16) |                 |            |
| O(1)-Al(1)-C(2) | 96.94(6)   | O(1)-Al(1)-C(1) | 93.92(5)   |
| C(2)-Al(1)-C(1) | 124.49(7)  | O(1)-Al(1)-N(1) | 87.00(4)   |
| C(2)-Al(1)-N(1) | 116.08(6)  | C(1)-Al(1)-N(1) | 118.73(6)  |
| O(1)-Al(1)-N(2) | 163.45(5)  | C(2)-Al(1)-N(2) | 94.67(6)   |
| C(1)-Al(1)-N(2) | 89.16(6)   | N(1)-Al(1)-N(2) | 77.30(5)   |

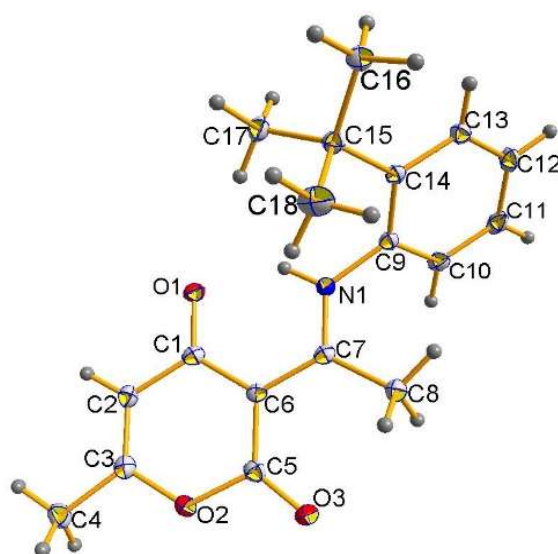

**Figure S1.** The molecular geometry of ligand **L<sup>1</sup>H**. Thermal ellipsoids are drawn at 30% probability level.

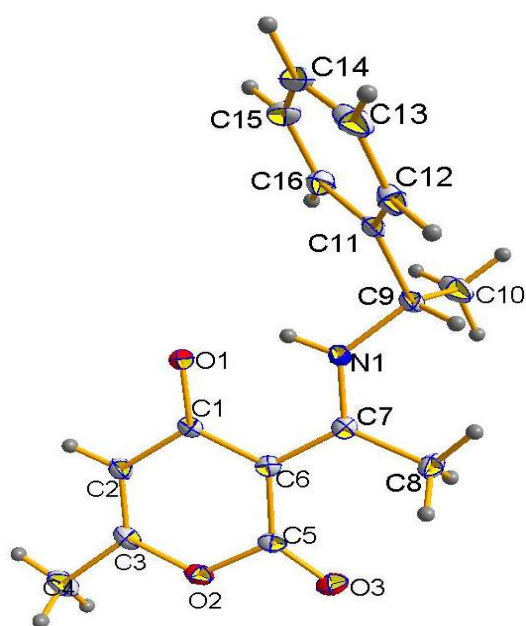

**Figure S2.** The molecular geometry of ligand L<sup>2</sup>H. Thermal ellipsoids are drawn at 30% probability level.

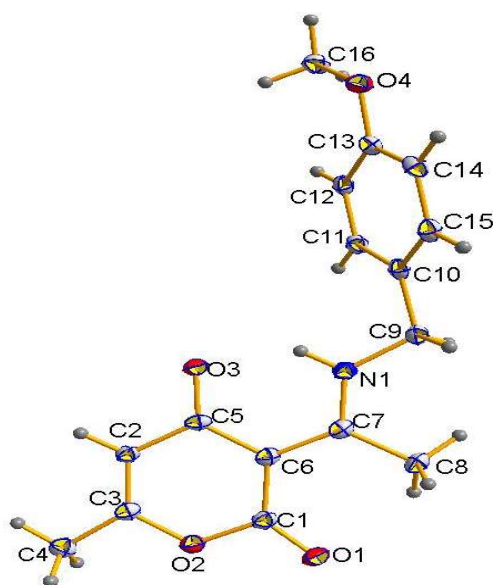

**Figure S3.** The molecular geometry of ligand L<sup>3</sup>H. Thermal ellipsoids are drawn at 30% probability level.

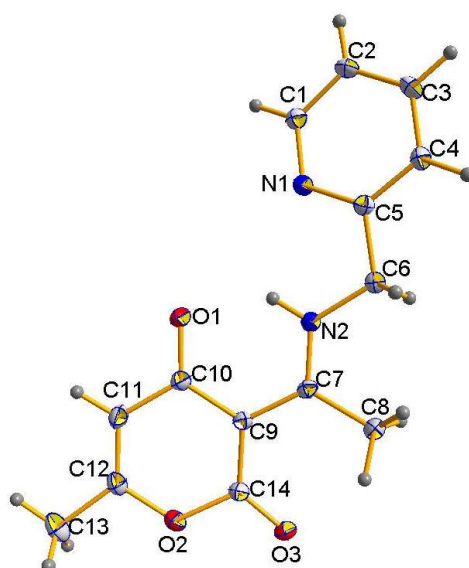

**Figure S4.** The molecular geometry of ligand **L<sup>4</sup>H**. Thermal ellipsoids are drawn at 30% probability level.

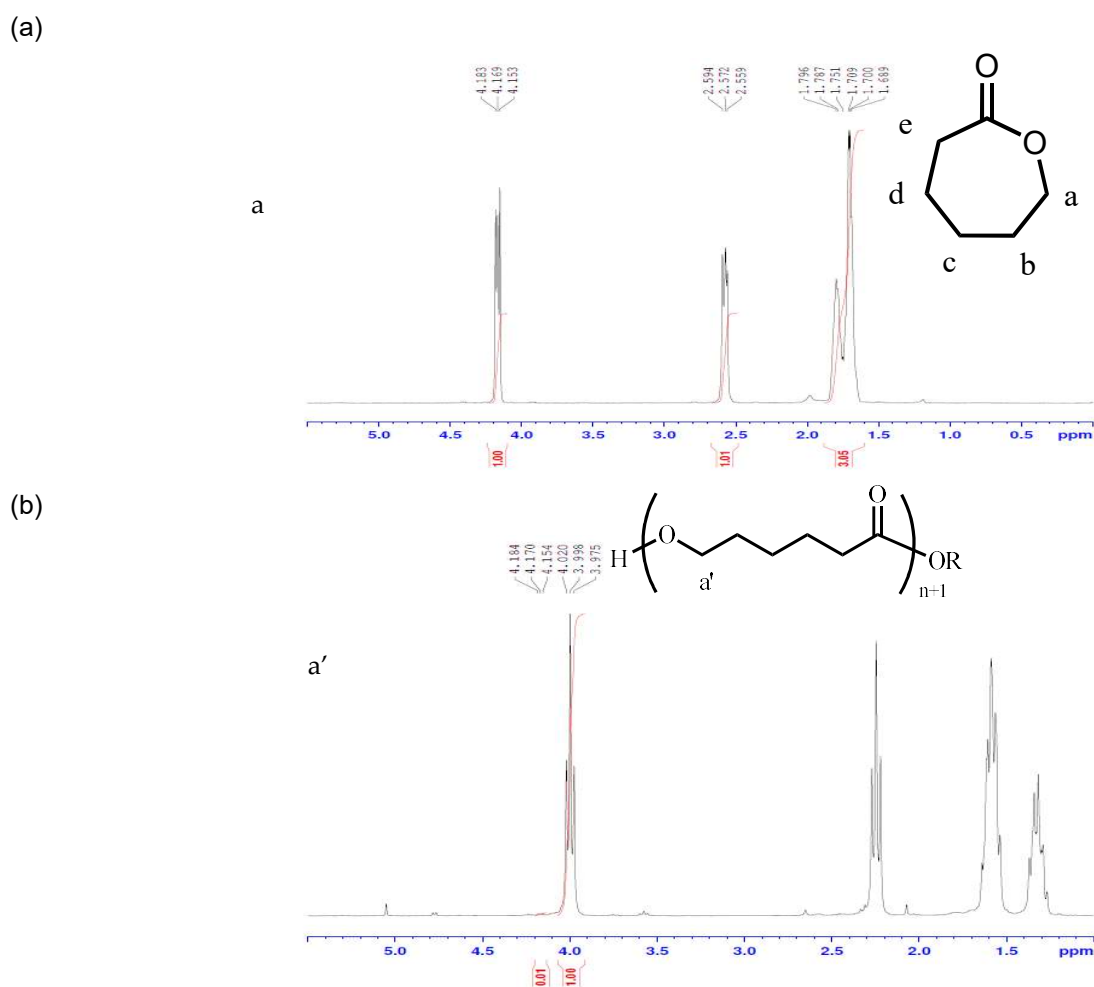

**Figure S5.**  $^1\text{H}$  NMR spectra of (a)  $\epsilon$ -caprolactone (b) poly- $\epsilon$ -caprolactone in  $\text{CDCl}_3$  using 300 MHz NMR spectrometer.

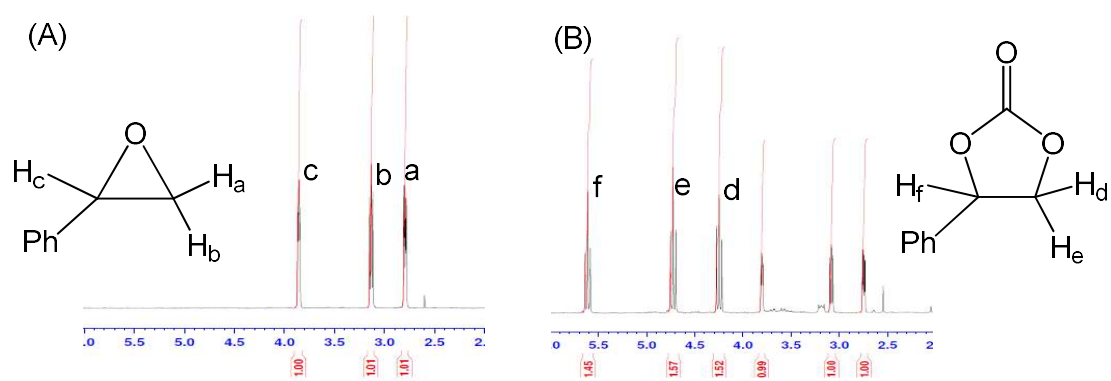

**Figure S6.** The  $^1\text{H}$  NMR spectra showing the proton signals of (A) styrene oxide and (B) mixture of styrene oxide and styrene carbonate in the range of  $\delta$  6.0~2.0
